# Supplementary material for: Dynamic Altered Amplitude of Low-Frequency Fluctuations in Patients With Major Depressive Disorder
Source: Front Psychiatry. 2021 Jul 19;12:683610. doi: 10.3389/fpsyt.2021.683610 (PMC8328277; doi:10.3389/fpsyt.2021.683610)
Supplement: Supplementary file 6 [file Data_Sheet_1.docx]

**Supplementarymaterials for**

“Dynamic altered of amplitude of low-frequency fluctuations in patients with major depressive disorder”

Ruiping Zheng1,3-8#, PhD, Yuan Chen1,3-8#, MD, Yu Jiang1,3-8, MD, Mengmeng Wen1,3-8, MD, Bingqian Zhou1,3-8, MD, Shuying Li2, PhD, Yarui Wei1,3-8, PhD, Zhengui Yang1,3-8, MD, Jingliang Cheng1,3-8*, PhD, Yong Zhang1,3-8*, PhD, Shaoqiang Han1,3-8*, PhD

**Author Affiliation:**

1Department of Magnetic Resonance Imaging, the First Affiliated Hospital of Zhengzhou University

2Department of Psychiatry, the First Affiliated Hospital of Zhengzhou University

3Key Laboratory for functional magnetic resonance imaging and molecular imaging of Henan Province

4Engineering Technology Research Center for detection and application of brain function of Henan Province

5Engineering Research Center of medical imaging intelligent diagnosis and treatment of Henan Province

6Key Laboratory of magnetic resonance and brain function of Henan Province

7Key Laboratory of brain function and cognitive magnetic resonance imaging of Zhengzhou

8 Key Laboratory of Imaging Intelligence Research medicine of Henan Province

# Ruiping Zheng and Yuan Chen contributed equally to the present work

***Corresponding Author**

Corresponding authors at: Functional and Molecular Imaging Key Laboratory of Henan Province, Department of MRI division, First Affiliated Hospital of Zhengzhou University, Henan, PR China.

E-mail addresses: fccchengjl@zzu.edu.cn (J. Cheng), zzuzhangyong2013@163.com (Y. Zhang), ShaoqiangHan@163.com (S. Han).

**Table S1.**Brain regions showing significant differences insALFF between MDD patientsand HC subjects

**Abbreviations:** sALFF = static amplitude of low-frequency fluctuation; MDD = major depressive disorder; HC = healthy control; MNI = Montreal Neurological Institute; L=left; R=right

| Regions | MNI coordinates | | |  | Voxels | *T* value |
| --- | --- | --- | --- | --- | --- | --- |
|  | *x* | *y* | *z* |  |  |
| Calcarine _L | -12 | -54 | 0 |  | 37 | -5.24 |
| Calcarine _R | 18 | -66 | 9 |  | 29 | -4.77 |
| Occipital Lobe _L | -21 | -87 | -18 |  | 58 | -5.64 |
| Cerebellum Posterior Lobe _R | 27 | -72 | -18 |  | 143 | -6.00 |
| Fusiform Gyrus _L | -45 | -75 | -21 |  | 23 | -5.08 |
| Vermis | -3 | -75 | -24 |  | 26 | 4.25 |

**FigureS1.**Brain regions with significant group differences in sALFF. Group differences insALFF between the MDD and HC groups were identified using a two-sample *t*-test. The statistical significance level was set at *q*<0.05, topologicalFDRcorrected. Patients with MDD showed significantlydecreased sALFF in the bilateralcalcarine and left occipital lobe, leftfusiform gyrus and rightCPL and increased sALFF in the vermis.

Abbreviations: sALFF, static amplitude of low-frequency fluctuation; MDD, major depressive disorder; HC, healthy control; CPL, cerebellum posterior lobe.

**FigureS2.**Brain regions with significant group differences in dALFF variability (30 TRs; 0.6 overlap). Group differences of temporal variability of dALFF between the MDD and HC groups were identified using a two-sample *t*-test. The statistical significance level was set at*q*<0.05, topologicalFDRcorrected. Patients with MDD showed significantlyincreased dALFF variability in the bilateral SFG and right MFG, rightthalamus, right CPL and vermis and decreased dALFF variability in the right fusiform gyrus.

Abbreviations: dALFF, dynamic amplitude of low-frequency fluctuation; MDD, major depressive disorder; HC, healthy control; SFG, superior frontal gyrus; MFG, middle frontal gyrus; CPL, cerebellum posterior lobe.

**FigureS3.**Brain regions with significant group differences in dALFF variability (80 TRs; 0.6 overlap). Group differences of temporal variability of dALFF between the MDD and HC groups were identified using a two-sample *t*-test. The statistical significance level was set at*q*<0.05, topological FDRcorrected. Patients with MDD showed significantlyincreased dALFF variability in the bilateralthalamus, bilateral CPLand right MFG, right SFG,right STG, and vermis.

Abbreviations: dALFF, dynamic amplitude of low-frequency fluctuation; MDD, major depressive disorder; HC, healthy control; CPL, cerebellum posterior lobe; MFG, middle frontal gyrus; SFG, superior frontal gyrus; STG, superior temporal gyrus.

**FigureS4.**Brain regions with significant group differences in dALFF variability (50 TRs; 0.8 overlap). Group differences of temporal variability of dALFF between the MDD and HC groups were identified using a two-sample *t*-test. The statistical significance level was set at *q*<0.05, topological FDRcorrected. Patients with MDD showed significantly increased dALFF variability in the bilateral thalamus, bilateral SFG,bilateral CPL and left MFG and vermis.

Abbreviations: dALFF, dynamic amplitude of low-frequency fluctuation; MDD, major depressive disorder; HC, healthy control; SFG, superior frontal gyrus; CPL, cerebellum posterior lobe; MFG, middle frontal gyrus.

**FigureS5.**Brain regions with significant group differences in dALFF variability (50 TRs; 0.6 overlap). Group differences of temporal variability of dALFF between the MDD and HC groups were identified using a two-sample *t*-test. The statistical significance level was set at *q*<0.05, topological FDRcorrected. Patients with MDD showed significantly increased dALFF variability in the bilateral CPL, bilateral SFG, bilateralMFG, bilateral thalamus and left IFG, leftSTG and ACC, vermis.

Abbreviations: dALFF, dynamic amplitude of low-frequency fluctuation; MDD, major depressive disorder; HC, healthy control; CPL, cerebellum posterior lobe; SFG, superior frontal gyrus; MFG, middle frontal gyrus; IFG, inferior frontal gyrus; STG, superior temporal gyrus; ACC, anterior cingulatecortex.
